# Supplementary material
Source: PubMed Central journal article supplement (PMC8097877)
Supplement: 13063_2021_5235_MOESM1_ESM.pdf [file 13063_2021_5235_MOESM1_ESM.pdf]

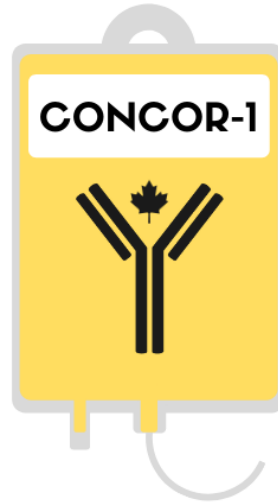

**CONCOR-1 Study:  
Source Data Worksheets**

**Study #: \_\_\_\_\_**

---

|             |                  |             |
|-------------|------------------|-------------|
| <b>Name</b> | <b>Signature</b> | <b>Date</b> |
|-------------|------------------|-------------|

---

|             |                  |             |
|-------------|------------------|-------------|
| <b>Name</b> | <b>Signature</b> | <b>Date</b> |
|-------------|------------------|-------------|

**[CONCOR-1\_ CONValescent Plasma for Acute COVID-19 Patients ]**

A Randomized Open-Label Trial of CONvalescent Plasma for Hospitalized Adults With Acute COVID-19 Respiratory Illness (CONCOR-1)

## REDCap Section: SCREENING

DO NOT ENTER ANY DATA IN REDCAP UNTIL YOU ARE READY TO RANDOMIZE!

### Informed Consent/Assent

|                                                                                                  |                                                         |                                                            |                                      |
|--------------------------------------------------------------------------------------------------|---------------------------------------------------------|------------------------------------------------------------|--------------------------------------|
| 1. Was the patient willing to give consent?                                                      | <input type="checkbox"/> Yes – Written Informed Consent | <input type="checkbox"/> Yes – Telephone Consent           |                                      |
| 2. Date and time of Informed Consent (dd.mm.yyyy; HH:MM):                                        |                                                         | __/__/____ :__                                             |                                      |
| 3. Who was the consent obtained from?                                                            | <input type="checkbox"/> Patient                        | <input type="checkbox"/> Legally Authorized Representative | <input type="checkbox"/> Other _____ |
| 4. Was the participant less than 18?<br><input type="checkbox"/> Yes <input type="checkbox"/> No | 5. Protocol Version:<br>_____                           | 6. Consent Version:<br>_____                               | 7. Who obtained consent?<br>_____    |
| <b>REMINDER: Written consent may be required in the future. Check local requirements.</b>        |                                                         |                                                            |                                      |

### Eligibility

Screening number (from site screening log): \_\_\_\_\_ Date of screening (dd/mm/yyyy): \_\_/\_\_/\_\_\_\_\_

Date of Respiratory Symptom Onset (dd/mm/yyyy): \_\_/\_\_/\_\_\_\_\_

#### Inclusion Criteria

##### INCLUSION CRITERIA

- |                                                                                                                  |                              |                             |
|------------------------------------------------------------------------------------------------------------------|------------------------------|-----------------------------|
| 1. Age $\geq$ 16 years of age                                                                                    | Yes <input type="checkbox"/> | No <input type="checkbox"/> |
| 2. Admitted to hospital with confirmed COVID-19 respiratory illness                                              | Yes <input type="checkbox"/> | No <input type="checkbox"/> |
| 3. Requires supplemental oxygen                                                                                  | Yes <input type="checkbox"/> | No <input type="checkbox"/> |
| 4. 500 mL of ABO compatible plasma is available (please check "Project Bookmarks" for the inventory information) | Yes <input type="checkbox"/> | No <input type="checkbox"/> |

##### EXCLUSION CRITERIA

- |                                                                              |                              |                             |
|------------------------------------------------------------------------------|------------------------------|-----------------------------|
| 1. Intubated or plan in place for intubation                                 | Yes <input type="checkbox"/> | No <input type="checkbox"/> |
| 2. Plasma is contraindicated (e.g., history of anaphylaxis from transfusion) | Yes <input type="checkbox"/> | No <input type="checkbox"/> |
| 3. Decision in place for no active treatment                                 | Yes <input type="checkbox"/> | No <input type="checkbox"/> |
| 4. Onset of respiratory signs or symptoms > 12 days prior to randomization   | Yes <input type="checkbox"/> | No <input type="checkbox"/> |

This patient is:     Eligible     Ineligible

**Please have your site investigator sign off on eligibility in REDCap prior to randomization**

## Randomization

|                                                                                                                                                     |                                                                                                          |                                                                   |                                                                          |
|-----------------------------------------------------------------------------------------------------------------------------------------------------|----------------------------------------------------------------------------------------------------------|-------------------------------------------------------------------|--------------------------------------------------------------------------|
| 1. Patient meets eligibility criteria?<br><input type="checkbox"/> Yes <input type="checkbox"/> No                                                  |                                                                                                          | 2. Date of Randomization ( <i>dd.mm.yyyy</i> ):<br>__ / __ / ____ |                                                                          |
| 3. Number of days (at randomization) since symptom onset [*if > 12, patient is a SCREEN FAIL]: _____                                                |                                                                                                          | 4. Age: _____                                                     | 5. Age group: <input type="checkbox"/> <60 <input type="checkbox"/> ≥ 60 |
| <b>RANDOMIZATION: Please confirm with the hub blood bank for the availability of 500 mL ABO compatible convalescent plasma before randomization</b> |                                                                                                          |                                                                   |                                                                          |
| 6. Randomization time (HH:MM): _____                                                                                                                | 7. Randomized to: <input type="checkbox"/> Convalescent Plasma <input type="checkbox"/> Standard of Care |                                                                   | 8. Randomized by:<br>_____                                               |

EQ-5D-5L (QoL Questionnaire) – Baseline **\*FILL THIS OUT AS YOUR SOURCE DOCUMENT**

We are trying to find out what you think about your health. I will first ask you some simple questions about your health TODAY. I will then ask you to rate your health on a measuring scale. I will explain what to do as I go along but please interrupt me if you do not understand something or if things are not clear to you. Please also remember that there are no right or wrong answers. We are interested here only in your personal view.

**First I am going to read out some questions. Each question has a choice of five answers. Please tell me which answer best describes your health TODAY. Do not choose more than one answer in each group of questions.**

- The participant is not capable of responding

Date of survey (dd/mm/yyyy): \_\_/\_\_/\_\_\_\_

Please tick ONE box that describes your health TODAY:

1. Mobility

- You have no problems in walking about
- You have slight problems in walking about
- You have moderate problems in walking about
- You have severe problems in walking about
- You am unable to walk about

Please tick ONE box that describes your health TODAY:

2. Self-Care

- You have no problems washing or dressing myself
- You have slight problems washing or dressing myself
- You have moderate problems washing or dressing myself
- You have severe problems washing or dressing myself
- You am unable to wash or dress myself

Please tick ONE box that describes your health TODAY:

3. Usual Activities (e.g., work, study, housework, family or leisure activities)

- You have no problems doing my usual activities
- You have slight problems doing my usual activities
- You have moderate problems doing my usual activities
- You have severe problems doing my usual activities
- You am unable to do my usual activities

Please tick ONE box that describes your health TODAY:

4. Pain/Discomfort:

- You have no pain or discomfort
- You have slight pain or discomfort
- You have moderate pain or discomfort
- You have severe pain or discomfort
- You have extreme pain or discomfort

Please tick ONE box that describes your health TODAY:

5. Anxiety/Depression:

- You am not anxious or depressed
- You am slightly anxious or depressed
- You am moderately anxious or depressed
- You am severely anxious or depressed
- You am extremely anxious or depressed

## REDCap Section: Baseline (Day 1)

### CCP Administration

|                                                                                                                                                                                                                                                                                                                                  |                                                                                                                              |                                                                                           |
|----------------------------------------------------------------------------------------------------------------------------------------------------------------------------------------------------------------------------------------------------------------------------------------------------------------------------------|------------------------------------------------------------------------------------------------------------------------------|-------------------------------------------------------------------------------------------|
| <p>Date of 1<sup>st</sup> unit (DD/MM/YYYY) __/__/_____</p> <p>Start Time: __ : __      End Time: __ : __</p> <p>Total transfusion volume administered (mL):<br/>_____</p>                                                                                                                                                       | <p>Unit Number:<br/>_____</p> <p>Product Code:<br/>_____</p> <p>ABO<br/>_____</p> <p>Group: _____</p>                        | <p><input type="radio"/> 1 unit of 500cc</p> <p><input type="radio"/> 1 unit of 250cc</p> |
| <p>Was the transfusion interrupted?    <input type="radio"/> Yes <input type="radio"/> No</p> <p>Total length of interruption (in minutes):<br/>_____</p> <p>If interrupted, reason for interruption:</p> <p><input type="radio"/> Adverse transfusion reaction (complete AE form)</p> <p><input type="radio"/> Other reason</p> | <p>Was the transfusion restarted?<br/><input type="radio"/> Yes    <input type="radio"/> No    <input type="radio"/> N/A</p> |                                                                                           |
| <p>Date of 2<sup>nd</sup> unit (DD/MM/YYYY) __/__/_____</p> <p>Start Time: __ : __      End Time: __ : __</p> <p><input type="radio"/> N/A</p> <p>Total transfusion volume administered (mL):<br/>_____</p>                                                                                                                      | <p>Unit Number:<br/>_____</p> <p>Product Code:<br/>_____</p> <p>ABO Group:<br/>_____</p>                                     | <p><input type="radio"/> 1 unit of 250cc</p>                                              |
| <p>Was the transfusion interrupted?    <input type="radio"/> Yes <input type="radio"/> No</p> <p>Total length of interruption (in minutes):<br/>_____</p> <p>If interrupted, reason for interruption:</p> <p><input type="radio"/> Adverse transfusion reaction (complete AE form)</p> <p><input type="radio"/> Other reason</p> | <p>Was the transfusion restarted?<br/><input type="radio"/> Yes    <input type="radio"/> No    <input type="radio"/> N/A</p> |                                                                                           |

**Blood Sample Collection for Viral Load/Antibody testing (REDCap Section: Baseline Day 1 and Day 2)**
**Sample #1: Pre-transfusion**

1. Was a sample collected for the 1<sup>st</sup> sample (within 48 hours prior to randomization):  Yes  No  
If not collected, reason? \_\_\_\_\_
2. Date and time blood sample collected from patient (DD/MM/YYYY HH:MM): \_\_/\_\_/\_\_\_\_: \_\_
3. Date and time research sample processed (DD/MM/YYYY HH:MM): \_\_/\_\_/\_\_\_\_: \_\_
4. Sample ID number (please make sure you have entered this into REDCap within one week): \_\_\_\_\_
5. a. Type of sample:  Serum  Plasma  
b. Type of anticoagulant:  EDTA  Citrate  Lithium  Heparin  NaF
6. Number of cryovials collected:  1  2
7. Volume per tube:
  - a. Tube 1: \_\_\_\_\_
  - b. Tube 2: \_\_\_\_\_

**Sample #2: Post-transfusion**

1. Was a sample collected for the 2<sup>nd</sup> sample (closest to 48 hours but within 24 hrs – 5 days after randomization):  
 Yes  No  
If not collected, reason? \_\_\_\_\_
2. Date and time blood sample collected from patient (DD/MM/YYYY HH:MM): \_\_/\_\_/\_\_\_\_: \_\_
3. Date and time research sample processed (DD/MM/YYYY HH:MM): \_\_/\_\_/\_\_\_\_: \_\_
4. Sample ID number (please make sure you have entered this into REDCap within one week): \_\_\_\_\_
5. a. Type of sample:  Serum  Plasma  
b. Type of anticoagulant:  EDTA  Citrate  Lithium  Heparin  NaF
6. Number of cryovials collected:  1  2
7. Volume per tube:
  - a. Tube 1: \_\_\_\_\_
  - b. Tube 2: \_\_\_\_\_

**\*if sample was not collected, record as a minor protocol deviation in your on-site log**

## Hospitalization Assessment - Baseline (Day 1) to Day 30/Discharge (whichever comes first)

## Vital Signs (BASELINE ONLY) \*use most recent value prior to time of randomization

1. Blood Pressure Systolic (mmHg): \_\_\_\_\_
2. Blood Pressure Diastolic (mmHg): \_\_\_\_\_
3. Pulse (beats per minute): \_\_\_\_\_
4. Temperature (Celsius): \_\_\_\_\_

## COVID Testing

1. Method of testing:  Nasal Swab  Throat Swab  Sputum  Bronchoalveolar lavage  
 Nasopharyngeal Swab  Not known  Other \_\_\_\_\_
2. Date of positive COVID-19 test (DD/MM/YYYY): \_\_/\_\_/\_\_\_\_\_

## Participant Health Information:

1. Sex:  Male  Female
2. If female, is the patient pregnant?  Yes  No
  - a. If pregnant, estimated date of delivery (DD/MM/YYYY): \_\_/\_\_/\_\_\_\_\_

*If patient is pregnant, please enter a reminder into the Calendar application for one week after estimated due date – “Call participant and complete pregnancy outcomes form”*
3. Date and time of admission to hospital (DD/MM/YYYY HH:MM): \_\_/\_\_/\_\_\_\_\_ :\_\_
4. Participant location at time of enrollment:  ER  Ward  ICU
5. Participant month/year of birth (MM/YYYY): \_\_/\_\_\_\_\_
6. Ethnicity (check all that apply):  American Indian  Alaskan Native  Asian  
 White  Hispanic or Latino  Native Hawaiian/Other Pacific Islander  
 Black or African American/Canadian  Other: \_\_\_\_\_  Not known
7. ABO Group:  O  A  B  AB
8. Height (cm): \_\_\_\_\_
9. Weight (kg): \_\_\_\_\_
10. Medical History:
  - Diabetes  Hypertension  Ischemic Heart Disease  Stroke  Atrial Fibrillation
  - Congestive Heart Failure  Chronic Kidney Disease  Cirrhosis/liver disease  Asthma
  - COPD  Obstructive Sleep Apnea  Active Cancer  Dementia  Coagulation Disorder
  - History of Solid Organ Transplant  Immunosuppression  Other: \_\_\_\_\_
11. Smoking status:  Never Smoker  Former Smoker  Current Smoker
  - If former or current smoker, how many years did the participant smoke? \_\_\_\_\_
  - If former or current smoker, how many cigarettes does the participant smoke daily? \_\_\_\_\_
  - If former smoker, year ceased smoking: \_\_\_\_\_
12. Does the participant vape?  Yes  No
  - If yes, how often does the participant vape?  Daily  Weekly  Monthly
  - How many times does the participant vape in the time frame specified above? \_\_\_\_\_
13. Does the participant smoke cannabis?  Yes  No
  - If yes, how often does the participant smoke cannabis?  Daily  Weekly  Monthly
  - How many times does the participant smoke cannabis in the time frame specified above? \_\_\_\_\_

## 14. COVID-19 Symptoms at baseline:

- Fever  Cough  Shortness of breath  Myalgia/Arthralgia  Headache  Anosmia (loss of taste/smell)  Diarrhea  Vomiting  Fatigue  Other

Other symptoms: \_\_\_\_\_

15. Date of initial onset of *any* symptoms (this may be different from the initial onset of *respiratory* symptoms) (dd/mm/yyyy) : \_\_ / \_\_ / \_\_\_\_

## 16. Currently taking relevant medication for non COVID-19 reasons (last 7 days):

- ACE Inhibitor  ACE receptor blocker (ARB)  Non-steroidal anti-inflammatory drugs (NSAIDs)  
 Colchicine  Systemic corticosteroids  Inhaled corticosteroids  Immunomodulatory agents  
 Anticoagulants [ Direct oral anticoagulant;  Unfractionated Heparin;  Low Molecular Weight Heparin;  Warfarin]

## 17. All medication administered to treat COVID-19 before randomization:

|                                                                                                                                                                                                                                                                                  |                                                                                                                                                                                                                                                                                                                                                 |
|----------------------------------------------------------------------------------------------------------------------------------------------------------------------------------------------------------------------------------------------------------------------------------|-------------------------------------------------------------------------------------------------------------------------------------------------------------------------------------------------------------------------------------------------------------------------------------------------------------------------------------------------|
| <b>1. Antibiotics</b><br><input type="checkbox"/> Azithromycin (Zithromax, Z-pack)<br><input type="checkbox"/> Other antibiotic, specify: _____                                                                                                                                  | <b>2. Anti-inflammatory/immunomodulatory – check all below</b><br><input type="checkbox"/> Tocilizumab <input type="checkbox"/> Systemic corticosteroids<br><input type="checkbox"/> Colchicine <input type="checkbox"/> Inhaled corticosteroids<br><input type="checkbox"/> Interferon <input type="checkbox"/> Other anti-inflammatory: _____ |
| <b>3. Anti-viral – check all below</b><br><input type="checkbox"/> Chloroquine/hydroxychloroquine<br><input type="checkbox"/> Lopinavir-ritonavir<br><input type="checkbox"/> Oseltamivir <input type="checkbox"/> Remdesivir<br><input type="checkbox"/> Other antiviral: _____ | <b>4. Anticoagulants – check all below</b><br><input type="checkbox"/> Direct oral anticoagulant<br><input type="checkbox"/> Unfractionated Heparin<br><input type="checkbox"/> Low Molecular Weight Heparin<br><input type="checkbox"/> Warfarin<br><input type="checkbox"/> Other anticoagulant: _____                                        |
| <b>5. Other COVID relevant medications:</b> _____                                                                                                                                                                                                                                | <b>4b. If DOAC, UFH, LMWH, or other:</b><br>Dose: <input type="checkbox"/> prophylactic <input type="checkbox"/> therapeutic                                                                                                                                                                                                                    |

16a. Were any medications administered as part of another research study?  Yes  No

- i. Name of medication(s): \_\_\_\_\_ or  
 Study arm: \_\_\_\_\_ or  UNKNOWN—blinded study
- ii. Name of study or studies: \_\_\_\_\_

**Please enter all COVID-19 relevant medications the patient was on at baseline or started after randomization in the MEDICATION LOG**

18. Was medical imaging done (CT Chest and/or Chest Xray closest to randomization)?  Yes  No

| Medical Image 1:                                                                           | Date (DD/MM/YYYY): __/__/____                                                                                                                                                       | Medical Image 2:                                                                           | Date (DD/MM/YYYY): __/__/____                                                                                                                                                       |
|--------------------------------------------------------------------------------------------|-------------------------------------------------------------------------------------------------------------------------------------------------------------------------------------|--------------------------------------------------------------------------------------------|-------------------------------------------------------------------------------------------------------------------------------------------------------------------------------------|
| <b>1. Type</b><br><input type="checkbox"/> CT Chest<br><input type="checkbox"/> Chest Xray | <b>2. Result</b><br><input type="checkbox"/> Normal<br><input type="checkbox"/> Patchy Shadowing<br><input type="checkbox"/> Infiltrates<br><input type="checkbox"/> Other Abnormal | <b>1. Type</b><br><input type="checkbox"/> CT Chest<br><input type="checkbox"/> Chest Xray | <b>2. Result</b><br><input type="checkbox"/> Normal<br><input type="checkbox"/> Patchy Shadowing<br><input type="checkbox"/> Infiltrates<br><input type="checkbox"/> Other Abnormal |

If 'other abnormal', specify: \_\_\_\_\_



## REDCap Section: Baseline (Day 1) to Day 7, and Day 14

### Laboratory and Blood Gas Assessments

Please take last value of the day, if test not done write 'NA'. **If your site uses different units, please make the appropriate conversions.** Ensure you are entering in the units stated in the CRF.

\*Lab values for Day 1 should be the last value PRIOR to randomization for both the standard of care and control arms

|                                | 1* | 2 | 3 | 4 | 5 | 6 | 7 | 14<br>(+/- 3 days) |
|--------------------------------|----|---|---|---|---|---|---|--------------------|
| <b>Date:</b>                   |    |   |   |   |   |   |   |                    |
| RBC (x10 <sup>12</sup> /L)     |    |   |   |   |   |   |   |                    |
| WBC (x10 <sup>9</sup> /L)      |    |   |   |   |   |   |   |                    |
| HB (g/L)                       |    |   |   |   |   |   |   |                    |
| PLT (x10 <sup>9</sup> /L)      |    |   |   |   |   |   |   |                    |
| Neut (x10 <sup>9</sup> /L)     |    |   |   |   |   |   |   |                    |
| Lymph (x10 <sup>9</sup> /L)    |    |   |   |   |   |   |   |                    |
| Mono (x10 <sup>9</sup> /L)     |    |   |   |   |   |   |   |                    |
| Eosino (x10 <sup>9</sup> /L)   |    |   |   |   |   |   |   |                    |
| Baso (x10 <sup>9</sup> /L)     |    |   |   |   |   |   |   |                    |
| INR                            |    |   |   |   |   |   |   |                    |
| aPTT (seconds)                 |    |   |   |   |   |   |   |                    |
| Fibrinogen (g/L)               |    |   |   |   |   |   |   |                    |
| D-dimer (ug/L)                 |    |   |   |   |   |   |   |                    |
| ALT (U/L)                      |    |   |   |   |   |   |   |                    |
| ALP (U/L)                      |    |   |   |   |   |   |   |                    |
| LDH (U/L)                      |    |   |   |   |   |   |   |                    |
| Bilirubin (umol/L)             |    |   |   |   |   |   |   |                    |
| Creatinine (umol/L)            |    |   |   |   |   |   |   |                    |
| HS Troponin (ng/L)             |    |   |   |   |   |   |   |                    |
| Ferritin (g/L)                 |    |   |   |   |   |   |   |                    |
| Albumin (g/L)                  |    |   |   |   |   |   |   |                    |
| C-Reactive Protein (mg/L)      |    |   |   |   |   |   |   |                    |
| Total Protein (g/L)            |    |   |   |   |   |   |   |                    |
| Lactate (mmol/L)               |    |   |   |   |   |   |   |                    |
| Total CO <sub>2</sub> (mmol/L) |    |   |   |   |   |   |   |                    |

## REDCap Section: Baseline (Day 1) to Day 30/Discharge

**Oxygen Requirements and Parameters - If not available, write 'NA'.**

Please note that blood gases are only to be collected for Day 1-7 and Day 14 (+/- 3 days).

*\*Values for Day 1 should be the worst value of the day PRIOR to randomization for both the standard of care and control arms*

| Date:                                                                                                                                                  | 1*                                                                                                                                                                                                                       | 2                                                                                                                                                                                                                        | 3                                                                                                                                                                                                                        | 4                                                                                                                                                                                                                        | 5                                                                                                                                                                                                                        | 6                                                                                                                                                                                                                        | 7                                                                                                                                                                                                                        | 8                                                                                                                                                                                                                        | 9                                                                                                                                                                                                                        | 10                                                                                                                                                                                                                       |
|--------------------------------------------------------------------------------------------------------------------------------------------------------|--------------------------------------------------------------------------------------------------------------------------------------------------------------------------------------------------------------------------|--------------------------------------------------------------------------------------------------------------------------------------------------------------------------------------------------------------------------|--------------------------------------------------------------------------------------------------------------------------------------------------------------------------------------------------------------------------|--------------------------------------------------------------------------------------------------------------------------------------------------------------------------------------------------------------------------|--------------------------------------------------------------------------------------------------------------------------------------------------------------------------------------------------------------------------|--------------------------------------------------------------------------------------------------------------------------------------------------------------------------------------------------------------------------|--------------------------------------------------------------------------------------------------------------------------------------------------------------------------------------------------------------------------|--------------------------------------------------------------------------------------------------------------------------------------------------------------------------------------------------------------------------|--------------------------------------------------------------------------------------------------------------------------------------------------------------------------------------------------------------------------|--------------------------------------------------------------------------------------------------------------------------------------------------------------------------------------------------------------------------|
| <b>Oxygen requirement</b><br><small>HFNC – high flow nasal cannula<br/>                     NIPPV – non-invasive positive pressure ventilation</small> | <input type="checkbox"/> Nasal Prongs<br><input type="checkbox"/> Oxygen masks<br><input type="checkbox"/> HFNC<br><input type="checkbox"/> NIPPV<br><input type="checkbox"/> None<br><input type="checkbox"/> Intubated | <input type="checkbox"/> Nasal Prongs<br><input type="checkbox"/> Oxygen masks<br><input type="checkbox"/> HFNC<br><input type="checkbox"/> NIPPV<br><input type="checkbox"/> None<br><input type="checkbox"/> Intubated | <input type="checkbox"/> Nasal Prongs<br><input type="checkbox"/> Oxygen masks<br><input type="checkbox"/> HFNC<br><input type="checkbox"/> NIPPV<br><input type="checkbox"/> None<br><input type="checkbox"/> Intubated | <input type="checkbox"/> Nasal Prongs<br><input type="checkbox"/> Oxygen masks<br><input type="checkbox"/> HFNC<br><input type="checkbox"/> NIPPV<br><input type="checkbox"/> None<br><input type="checkbox"/> Intubated | <input type="checkbox"/> Nasal Prongs<br><input type="checkbox"/> Oxygen masks<br><input type="checkbox"/> HFNC<br><input type="checkbox"/> NIPPV<br><input type="checkbox"/> None<br><input type="checkbox"/> Intubated | <input type="checkbox"/> Nasal Prongs<br><input type="checkbox"/> Oxygen masks<br><input type="checkbox"/> HFNC<br><input type="checkbox"/> NIPPV<br><input type="checkbox"/> None<br><input type="checkbox"/> Intubated | <input type="checkbox"/> Nasal Prongs<br><input type="checkbox"/> Oxygen masks<br><input type="checkbox"/> HFNC<br><input type="checkbox"/> NIPPV<br><input type="checkbox"/> None<br><input type="checkbox"/> Intubated | <input type="checkbox"/> Nasal Prongs<br><input type="checkbox"/> Oxygen masks<br><input type="checkbox"/> HFNC<br><input type="checkbox"/> NIPPV<br><input type="checkbox"/> None<br><input type="checkbox"/> Intubated | <input type="checkbox"/> Nasal Prongs<br><input type="checkbox"/> Oxygen masks<br><input type="checkbox"/> HFNC<br><input type="checkbox"/> NIPPV<br><input type="checkbox"/> None<br><input type="checkbox"/> Intubated | <input type="checkbox"/> Nasal Prongs<br><input type="checkbox"/> Oxygen masks<br><input type="checkbox"/> HFNC<br><input type="checkbox"/> NIPPV<br><input type="checkbox"/> None<br><input type="checkbox"/> Intubated |
| <b>Prone positioning:</b>                                                                                                                              | <input type="checkbox"/> Yes<br><input type="checkbox"/> No<br><input type="checkbox"/> Unknown                                                                                                                          | <input type="checkbox"/> Yes<br><input type="checkbox"/> No<br><input type="checkbox"/> Unknown                                                                                                                          | <input type="checkbox"/> Yes<br><input type="checkbox"/> No<br><input type="checkbox"/> Unknown                                                                                                                          | <input type="checkbox"/> Yes<br><input type="checkbox"/> No<br><input type="checkbox"/> Unknown                                                                                                                          | <input type="checkbox"/> Yes<br><input type="checkbox"/> No<br><input type="checkbox"/> Unknown                                                                                                                          | <input type="checkbox"/> Yes<br><input type="checkbox"/> No<br><input type="checkbox"/> Unknown                                                                                                                          | <input type="checkbox"/> Yes<br><input type="checkbox"/> No<br><input type="checkbox"/> Unknown                                                                                                                          | <input type="checkbox"/> Yes<br><input type="checkbox"/> No<br><input type="checkbox"/> Unknown                                                                                                                          | <input type="checkbox"/> Yes<br><input type="checkbox"/> No<br><input type="checkbox"/> Unknown                                                                                                                          | <input type="checkbox"/> Yes<br><input type="checkbox"/> No<br><input type="checkbox"/> Unknown                                                                                                                          |
| <b>SpO<sub>2</sub> (%)</b><br><small>(worst value at time of worst FiO<sub>2</sub>)</small>                                                            |                                                                                                                                                                                                                          |                                                                                                                                                                                                                          |                                                                                                                                                                                                                          |                                                                                                                                                                                                                          |                                                                                                                                                                                                                          |                                                                                                                                                                                                                          |                                                                                                                                                                                                                          |                                                                                                                                                                                                                          |                                                                                                                                                                                                                          |                                                                                                                                                                                                                          |
| <b>FiO<sub>2</sub>* (%)</b><br><small>(worst value of the day)</small>                                                                                 |                                                                                                                                                                                                                          |                                                                                                                                                                                                                          |                                                                                                                                                                                                                          |                                                                                                                                                                                                                          |                                                                                                                                                                                                                          |                                                                                                                                                                                                                          |                                                                                                                                                                                                                          |                                                                                                                                                                                                                          |                                                                                                                                                                                                                          |                                                                                                                                                                                                                          |
| <b>Type of blood gas:</b>                                                                                                                              | <input type="checkbox"/> ABG<br><input type="checkbox"/> VBG<br><input type="checkbox"/> CBG<br><input type="checkbox"/> None                                                                                            | <input type="checkbox"/> ABG<br><input type="checkbox"/> VBG<br><input type="checkbox"/> CBG<br><input type="checkbox"/> None                                                                                            | <input type="checkbox"/> ABG<br><input type="checkbox"/> VBG<br><input type="checkbox"/> CBG<br><input type="checkbox"/> None                                                                                            | <input type="checkbox"/> ABG<br><input type="checkbox"/> VBG<br><input type="checkbox"/> CBG<br><input type="checkbox"/> None                                                                                            | <input type="checkbox"/> ABG<br><input type="checkbox"/> VBG<br><input type="checkbox"/> CBG<br><input type="checkbox"/> None                                                                                            | <input type="checkbox"/> ABG<br><input type="checkbox"/> VBG<br><input type="checkbox"/> CBG<br><input type="checkbox"/> None                                                                                            | <input type="checkbox"/> ABG<br><input type="checkbox"/> VBG<br><input type="checkbox"/> CBG<br><input type="checkbox"/> None                                                                                            |                                                                                                                                                                                                                          |                                                                                                                                                                                                                          |                                                                                                                                                                                                                          |
| <b>PaO<sub>2</sub> result</b><br><small>[mmHg] closest to time of worst FiO<sub>2</sub>)</small>                                                       |                                                                                                                                                                                                                          |                                                                                                                                                                                                                          |                                                                                                                                                                                                                          |                                                                                                                                                                                                                          |                                                                                                                                                                                                                          |                                                                                                                                                                                                                          |                                                                                                                                                                                                                          |                                                                                                                                                                                                                          |                                                                                                                                                                                                                          |                                                                                                                                                                                                                          |
| <b>PCO<sub>2</sub> result</b><br><small>[mmHg] (from same blood gas record on PaO<sub>2</sub>)</small>                                                 |                                                                                                                                                                                                                          |                                                                                                                                                                                                                          |                                                                                                                                                                                                                          |                                                                                                                                                                                                                          |                                                                                                                                                                                                                          |                                                                                                                                                                                                                          |                                                                                                                                                                                                                          |                                                                                                                                                                                                                          |                                                                                                                                                                                                                          |                                                                                                                                                                                                                          |

\*Please use the following table to convert L/min to %: <https://www.intensive.org/epic2/Documents/Estimation%20of%20PO2%20and%20FiO2.pdf>

Study #: \_\_\_\_\_

| Date:                                                                                                             | 11                                                                                                                                                                                                                       | 12                                                                                                                                                                                                                       | 13                                                                                                                                                                                                                      | 14                                                                                                                                                                                                                       | 15                                                                                                                                                                                                                       | 16                                                                                                                                                                                                                       | 17                                                                                                                                                                                                                       | 18                                                                                                                                                                                                                       | 19                                                                                                                                                                                                                       | 20                                                                                                                                                                                                                       |
|-------------------------------------------------------------------------------------------------------------------|--------------------------------------------------------------------------------------------------------------------------------------------------------------------------------------------------------------------------|--------------------------------------------------------------------------------------------------------------------------------------------------------------------------------------------------------------------------|-------------------------------------------------------------------------------------------------------------------------------------------------------------------------------------------------------------------------|--------------------------------------------------------------------------------------------------------------------------------------------------------------------------------------------------------------------------|--------------------------------------------------------------------------------------------------------------------------------------------------------------------------------------------------------------------------|--------------------------------------------------------------------------------------------------------------------------------------------------------------------------------------------------------------------------|--------------------------------------------------------------------------------------------------------------------------------------------------------------------------------------------------------------------------|--------------------------------------------------------------------------------------------------------------------------------------------------------------------------------------------------------------------------|--------------------------------------------------------------------------------------------------------------------------------------------------------------------------------------------------------------------------|--------------------------------------------------------------------------------------------------------------------------------------------------------------------------------------------------------------------------|
| <b>Oxygen requirement</b><br>HFNC – high flow nasal cannula<br>NIPPV – non-invasive positive pressure ventilation | <input type="checkbox"/> Nasal Prongs<br><input type="checkbox"/> Oxygen masks<br><input type="checkbox"/> HFNC<br><input type="checkbox"/> NIPPV<br><input type="checkbox"/> Intubated<br><input type="checkbox"/> None | <input type="checkbox"/> Nasal Prongs<br><input type="checkbox"/> Oxygen masks<br><input type="checkbox"/> HFNC<br><input type="checkbox"/> NIPPV<br><input type="checkbox"/> Intubated<br><input type="checkbox"/> None | <input type="checkbox"/> Nasal Prongs<br><input type="checkbox"/> Oxygen masks<br><input type="checkbox"/> HFNC<br><input type="checkbox"/> NIPPV<br><input type="checkbox"/> Intubated<br><input type="checkbox"/> Non | <input type="checkbox"/> Nasal Prongs<br><input type="checkbox"/> Oxygen masks<br><input type="checkbox"/> HFNC<br><input type="checkbox"/> NIPPV<br><input type="checkbox"/> Intubated<br><input type="checkbox"/> None | <input type="checkbox"/> Nasal Prongs<br><input type="checkbox"/> Oxygen masks<br><input type="checkbox"/> HFNC<br><input type="checkbox"/> NIPPV<br><input type="checkbox"/> Intubated<br><input type="checkbox"/> None | <input type="checkbox"/> Nasal Prongs<br><input type="checkbox"/> Oxygen masks<br><input type="checkbox"/> HFNC<br><input type="checkbox"/> NIPPV<br><input type="checkbox"/> Intubated<br><input type="checkbox"/> None | <input type="checkbox"/> Nasal Prongs<br><input type="checkbox"/> Oxygen masks<br><input type="checkbox"/> HFNC<br><input type="checkbox"/> NIPPV<br><input type="checkbox"/> Intubated<br><input type="checkbox"/> None | <input type="checkbox"/> Nasal Prongs<br><input type="checkbox"/> Oxygen masks<br><input type="checkbox"/> HFNC<br><input type="checkbox"/> NIPPV<br><input type="checkbox"/> Intubated<br><input type="checkbox"/> None | <input type="checkbox"/> Nasal Prongs<br><input type="checkbox"/> Oxygen masks<br><input type="checkbox"/> HFNC<br><input type="checkbox"/> NIPPV<br><input type="checkbox"/> Intubated<br><input type="checkbox"/> None | <input type="checkbox"/> Nasal Prongs<br><input type="checkbox"/> Oxygen masks<br><input type="checkbox"/> HFNC<br><input type="checkbox"/> NIPPV<br><input type="checkbox"/> Intubated<br><input type="checkbox"/> None |
| <b>Prone positioning:</b>                                                                                         | <input type="checkbox"/> Yes<br><input type="checkbox"/> No<br><input type="checkbox"/> Unknown                                                                                                                          | <input type="checkbox"/> Yes<br><input type="checkbox"/> No<br><input type="checkbox"/> Unknown                                                                                                                          | <input type="checkbox"/> Yes<br><input type="checkbox"/> No<br><input type="checkbox"/> Unknown                                                                                                                         | <input type="checkbox"/> Yes<br><input type="checkbox"/> No<br><input type="checkbox"/> Unknown                                                                                                                          | <input type="checkbox"/> Yes<br><input type="checkbox"/> No<br><input type="checkbox"/> Unknown                                                                                                                          | <input type="checkbox"/> Yes<br><input type="checkbox"/> No<br><input type="checkbox"/> Unknown                                                                                                                          | <input type="checkbox"/> Yes<br><input type="checkbox"/> No<br><input type="checkbox"/> Unknown                                                                                                                          | <input type="checkbox"/> Yes<br><input type="checkbox"/> No<br><input type="checkbox"/> Unknown                                                                                                                          | <input type="checkbox"/> Yes<br><input type="checkbox"/> No<br><input type="checkbox"/> Unknown                                                                                                                          | <input type="checkbox"/> Yes<br><input type="checkbox"/> No<br><input type="checkbox"/> Unknown                                                                                                                          |
| <b>SpO<sub>2</sub> (%)</b><br>(worst value at time of worst FiO <sub>2</sub> )                                    |                                                                                                                                                                                                                          |                                                                                                                                                                                                                          |                                                                                                                                                                                                                         |                                                                                                                                                                                                                          |                                                                                                                                                                                                                          |                                                                                                                                                                                                                          |                                                                                                                                                                                                                          |                                                                                                                                                                                                                          |                                                                                                                                                                                                                          |                                                                                                                                                                                                                          |
| <b>FiO<sub>2</sub>* (%)</b><br>(worst value of the day)                                                           |                                                                                                                                                                                                                          |                                                                                                                                                                                                                          |                                                                                                                                                                                                                         |                                                                                                                                                                                                                          |                                                                                                                                                                                                                          |                                                                                                                                                                                                                          |                                                                                                                                                                                                                          |                                                                                                                                                                                                                          |                                                                                                                                                                                                                          |                                                                                                                                                                                                                          |
| <b>Type of blood gas:</b>                                                                                         |                                                                                                                                                                                                                          |                                                                                                                                                                                                                          |                                                                                                                                                                                                                         | <input type="checkbox"/> ABG<br><input type="checkbox"/> VBG<br><input type="checkbox"/> CBG<br><input type="checkbox"/> None                                                                                            |                                                                                                                                                                                                                          |                                                                                                                                                                                                                          |                                                                                                                                                                                                                          |                                                                                                                                                                                                                          |                                                                                                                                                                                                                          |                                                                                                                                                                                                                          |
| <b>PaO<sub>2</sub> result [mmHg]</b> (closest to time of worst FiO <sub>2</sub> )                                 |                                                                                                                                                                                                                          |                                                                                                                                                                                                                          |                                                                                                                                                                                                                         |                                                                                                                                                                                                                          |                                                                                                                                                                                                                          |                                                                                                                                                                                                                          |                                                                                                                                                                                                                          |                                                                                                                                                                                                                          |                                                                                                                                                                                                                          |                                                                                                                                                                                                                          |
| <b>PCO<sub>2</sub> result [mmHg]</b> (from same blood gas record on PaO <sub>2</sub> )                            |                                                                                                                                                                                                                          |                                                                                                                                                                                                                          |                                                                                                                                                                                                                         |                                                                                                                                                                                                                          |                                                                                                                                                                                                                          |                                                                                                                                                                                                                          |                                                                                                                                                                                                                          |                                                                                                                                                                                                                          |                                                                                                                                                                                                                          |                                                                                                                                                                                                                          |

\*Please use the following table to convert L/min to %: <https://www.intensive.org/epic2/Documents/Estimation%20of%20PO2%20and%20FiO2.pdf>

Study #: \_\_\_\_\_

| Date:                                                                                                                              | 21                                                                                                                                                                                                                       | 22                                                                                                                                                                                                                       | 23                                                                                                                                                                                                                       | 24                                                                                                                                                                                                                       | 25                                                                                                                                                                                                                       | 26                                                                                                                                                                                                                       | 27                                                                                                                                                                                                                       | 28                                                                                                                                                                                                                       | 29                                                                                                                                                                                                                       | 30                                                                                                                                                                                                                       |
|------------------------------------------------------------------------------------------------------------------------------------|--------------------------------------------------------------------------------------------------------------------------------------------------------------------------------------------------------------------------|--------------------------------------------------------------------------------------------------------------------------------------------------------------------------------------------------------------------------|--------------------------------------------------------------------------------------------------------------------------------------------------------------------------------------------------------------------------|--------------------------------------------------------------------------------------------------------------------------------------------------------------------------------------------------------------------------|--------------------------------------------------------------------------------------------------------------------------------------------------------------------------------------------------------------------------|--------------------------------------------------------------------------------------------------------------------------------------------------------------------------------------------------------------------------|--------------------------------------------------------------------------------------------------------------------------------------------------------------------------------------------------------------------------|--------------------------------------------------------------------------------------------------------------------------------------------------------------------------------------------------------------------------|--------------------------------------------------------------------------------------------------------------------------------------------------------------------------------------------------------------------------|--------------------------------------------------------------------------------------------------------------------------------------------------------------------------------------------------------------------------|
| <b>Oxygen requirement</b><br><small>HFNC – high flow nasal cannula<br/> NIPPV – non-invasive positive pressure ventilation</small> | <input type="checkbox"/> Nasal Prongs<br><input type="checkbox"/> Oxygen masks<br><input type="checkbox"/> HFNC<br><input type="checkbox"/> NIPPV<br><input type="checkbox"/> Intubated<br><input type="checkbox"/> None | <input type="checkbox"/> Nasal Prongs<br><input type="checkbox"/> Oxygen masks<br><input type="checkbox"/> HFNC<br><input type="checkbox"/> NIPPV<br><input type="checkbox"/> Intubated<br><input type="checkbox"/> None | <input type="checkbox"/> Nasal Prongs<br><input type="checkbox"/> Oxygen masks<br><input type="checkbox"/> HFNC<br><input type="checkbox"/> NIPPV<br><input type="checkbox"/> Intubated<br><input type="checkbox"/> None | <input type="checkbox"/> Nasal Prongs<br><input type="checkbox"/> Oxygen masks<br><input type="checkbox"/> HFNC<br><input type="checkbox"/> NIPPV<br><input type="checkbox"/> Intubated<br><input type="checkbox"/> None | <input type="checkbox"/> Nasal Prongs<br><input type="checkbox"/> Oxygen masks<br><input type="checkbox"/> HFNC<br><input type="checkbox"/> NIPPV<br><input type="checkbox"/> Intubated<br><input type="checkbox"/> None | <input type="checkbox"/> Nasal Prongs<br><input type="checkbox"/> Oxygen masks<br><input type="checkbox"/> HFNC<br><input type="checkbox"/> NIPPV<br><input type="checkbox"/> Intubated<br><input type="checkbox"/> None | <input type="checkbox"/> Nasal Prongs<br><input type="checkbox"/> Oxygen masks<br><input type="checkbox"/> HFNC<br><input type="checkbox"/> NIPPV<br><input type="checkbox"/> Intubated<br><input type="checkbox"/> None | <input type="checkbox"/> Nasal Prongs<br><input type="checkbox"/> Oxygen masks<br><input type="checkbox"/> HFNC<br><input type="checkbox"/> NIPPV<br><input type="checkbox"/> Intubated<br><input type="checkbox"/> None | <input type="checkbox"/> Nasal Prongs<br><input type="checkbox"/> Oxygen masks<br><input type="checkbox"/> HFNC<br><input type="checkbox"/> NIPPV<br><input type="checkbox"/> Intubated<br><input type="checkbox"/> None | <input type="checkbox"/> Nasal Prongs<br><input type="checkbox"/> Oxygen masks<br><input type="checkbox"/> HFNC<br><input type="checkbox"/> NIPPV<br><input type="checkbox"/> Intubated<br><input type="checkbox"/> None |
| <b>Prone positioning:</b>                                                                                                          | <input type="checkbox"/> Yes<br><input type="checkbox"/> No<br><input type="checkbox"/> Unknown                                                                                                                          | <input type="checkbox"/> Yes<br><input type="checkbox"/> No<br><input type="checkbox"/> Unknown                                                                                                                          | <input type="checkbox"/> Yes<br><input type="checkbox"/> No<br><input type="checkbox"/> Unknown                                                                                                                          | <input type="checkbox"/> Yes<br><input type="checkbox"/> No<br><input type="checkbox"/> Unknown                                                                                                                          | <input type="checkbox"/> Yes<br><input type="checkbox"/> No<br><input type="checkbox"/> Unknown                                                                                                                          | <input type="checkbox"/> Yes<br><input type="checkbox"/> No<br><input type="checkbox"/> Unknown                                                                                                                          | <input type="checkbox"/> Yes<br><input type="checkbox"/> No<br><input type="checkbox"/> Unknown                                                                                                                          | <input type="checkbox"/> Yes<br><input type="checkbox"/> No<br><input type="checkbox"/> Unknown                                                                                                                          | <input type="checkbox"/> Yes<br><input type="checkbox"/> No<br><input type="checkbox"/> Unknown                                                                                                                          | <input type="checkbox"/> Yes<br><input type="checkbox"/> No<br><input type="checkbox"/> Unknown                                                                                                                          |
| <b>SpO<sub>2</sub> (%)</b><br><small>(worst value at time of worst FiO<sub>2</sub>)</small>                                        |                                                                                                                                                                                                                          |                                                                                                                                                                                                                          |                                                                                                                                                                                                                          |                                                                                                                                                                                                                          |                                                                                                                                                                                                                          |                                                                                                                                                                                                                          |                                                                                                                                                                                                                          |                                                                                                                                                                                                                          |                                                                                                                                                                                                                          |                                                                                                                                                                                                                          |
| <b>FiO<sub>2</sub>* (%)</b><br><small>(worst value of the day)</small>                                                             |                                                                                                                                                                                                                          |                                                                                                                                                                                                                          |                                                                                                                                                                                                                          |                                                                                                                                                                                                                          |                                                                                                                                                                                                                          |                                                                                                                                                                                                                          |                                                                                                                                                                                                                          |                                                                                                                                                                                                                          |                                                                                                                                                                                                                          |                                                                                                                                                                                                                          |

\*Please use the following table to convert L/min to %: <https://www.intensive.org/epic2/Documents/Estimation%20of%20PO2%20and%20FiO2.pdf>

Study #: \_\_\_\_\_

Additional Study Outcomes of Interest – enter into REDCap Section: Day 30

|                          |                                                             |                                                             |                                                             |                                                             |                                                             |                                                             |                                                             |                                                             |                                                             |                                                             |
|--------------------------|-------------------------------------------------------------|-------------------------------------------------------------|-------------------------------------------------------------|-------------------------------------------------------------|-------------------------------------------------------------|-------------------------------------------------------------|-------------------------------------------------------------|-------------------------------------------------------------|-------------------------------------------------------------|-------------------------------------------------------------|
| <b>Date:</b>             | <b>1</b>                                                    | <b>2</b>                                                    | <b>3</b>                                                    | <b>4</b>                                                    | <b>5</b>                                                    | <b>6</b>                                                    | <b>7</b>                                                    | <b>8</b>                                                    | <b>9</b>                                                    | <b>10</b>                                                   |
| <b>ECMO</b>              | <input type="checkbox"/> Yes<br><input type="checkbox"/> No | <input type="checkbox"/> Yes<br><input type="checkbox"/> No | <input type="checkbox"/> Yes<br><input type="checkbox"/> No | <input type="checkbox"/> Yes<br><input type="checkbox"/> No | <input type="checkbox"/> Yes<br><input type="checkbox"/> No | <input type="checkbox"/> Yes<br><input type="checkbox"/> No | <input type="checkbox"/> Yes<br><input type="checkbox"/> No | <input type="checkbox"/> Yes<br><input type="checkbox"/> No | <input type="checkbox"/> Yes<br><input type="checkbox"/> No | <input type="checkbox"/> Yes<br><input type="checkbox"/> No |
| <b>Renal Replacement</b> | <input type="checkbox"/> Yes<br><input type="checkbox"/> No | <input type="checkbox"/> Yes<br><input type="checkbox"/> No | <input type="checkbox"/> Yes<br><input type="checkbox"/> No | <input type="checkbox"/> Yes<br><input type="checkbox"/> No | <input type="checkbox"/> Yes<br><input type="checkbox"/> No | <input type="checkbox"/> Yes<br><input type="checkbox"/> No | <input type="checkbox"/> Yes<br><input type="checkbox"/> No | <input type="checkbox"/> Yes<br><input type="checkbox"/> No | <input type="checkbox"/> Yes<br><input type="checkbox"/> No | <input type="checkbox"/> Yes<br><input type="checkbox"/> No |
| <b>Myocarditis</b>       | <input type="checkbox"/> Yes<br><input type="checkbox"/> No | <input type="checkbox"/> Yes<br><input type="checkbox"/> No | <input type="checkbox"/> Yes<br><input type="checkbox"/> No | <input type="checkbox"/> Yes<br><input type="checkbox"/> No | <input type="checkbox"/> Yes<br><input type="checkbox"/> No | <input type="checkbox"/> Yes<br><input type="checkbox"/> No | <input type="checkbox"/> Yes<br><input type="checkbox"/> No | <input type="checkbox"/> Yes<br><input type="checkbox"/> No | <input type="checkbox"/> Yes<br><input type="checkbox"/> No | <input type="checkbox"/> Yes<br><input type="checkbox"/> No |
| <b>Date:</b>             | <b>11</b>                                                   | <b>12</b>                                                   | <b>13</b>                                                   | <b>14</b>                                                   | <b>15</b>                                                   | <b>16</b>                                                   | <b>17</b>                                                   | <b>18</b>                                                   | <b>19</b>                                                   | <b>20</b>                                                   |
| <b>ECMO</b>              | <input type="checkbox"/> Yes<br><input type="checkbox"/> No | <input type="checkbox"/> Yes<br><input type="checkbox"/> No | <input type="checkbox"/> Yes<br><input type="checkbox"/> No | <input type="checkbox"/> Yes<br><input type="checkbox"/> No | <input type="checkbox"/> Yes<br><input type="checkbox"/> No | <input type="checkbox"/> Yes<br><input type="checkbox"/> No | <input type="checkbox"/> Yes<br><input type="checkbox"/> No | <input type="checkbox"/> Yes<br><input type="checkbox"/> No | <input type="checkbox"/> Yes<br><input type="checkbox"/> No | <input type="checkbox"/> Yes<br><input type="checkbox"/> No |
| <b>Renal Replacement</b> | <input type="checkbox"/> Yes<br><input type="checkbox"/> No | <input type="checkbox"/> Yes<br><input type="checkbox"/> No | <input type="checkbox"/> Yes<br><input type="checkbox"/> No | <input type="checkbox"/> Yes<br><input type="checkbox"/> No | <input type="checkbox"/> Yes<br><input type="checkbox"/> No | <input type="checkbox"/> Yes<br><input type="checkbox"/> No | <input type="checkbox"/> Yes<br><input type="checkbox"/> No | <input type="checkbox"/> Yes<br><input type="checkbox"/> No | <input type="checkbox"/> Yes<br><input type="checkbox"/> No | <input type="checkbox"/> Yes<br><input type="checkbox"/> No |
| <b>Myocarditis</b>       | <input type="checkbox"/> Yes<br><input type="checkbox"/> No | <input type="checkbox"/> Yes<br><input type="checkbox"/> No | <input type="checkbox"/> Yes<br><input type="checkbox"/> No | <input type="checkbox"/> Yes<br><input type="checkbox"/> No | <input type="checkbox"/> Yes<br><input type="checkbox"/> No | <input type="checkbox"/> Yes<br><input type="checkbox"/> No | <input type="checkbox"/> Yes<br><input type="checkbox"/> No | <input type="checkbox"/> Yes<br><input type="checkbox"/> No | <input type="checkbox"/> Yes<br><input type="checkbox"/> No | <input type="checkbox"/> Yes<br><input type="checkbox"/> No |
| <b>Date:</b>             | <b>21</b>                                                   | <b>22</b>                                                   | <b>23</b>                                                   | <b>24</b>                                                   | <b>25</b>                                                   | <b>26</b>                                                   | <b>27</b>                                                   | <b>28</b>                                                   | <b>29</b>                                                   | <b>30</b>                                                   |
| <b>ECMO</b>              | <input type="checkbox"/> Yes<br><input type="checkbox"/> No | <input type="checkbox"/> Yes<br><input type="checkbox"/> No | <input type="checkbox"/> Yes<br><input type="checkbox"/> No | <input type="checkbox"/> Yes<br><input type="checkbox"/> No | <input type="checkbox"/> Yes<br><input type="checkbox"/> No | <input type="checkbox"/> Yes<br><input type="checkbox"/> No | <input type="checkbox"/> Yes<br><input type="checkbox"/> No | <input type="checkbox"/> Yes<br><input type="checkbox"/> No | <input type="checkbox"/> Yes<br><input type="checkbox"/> No | <input type="checkbox"/> Yes<br><input type="checkbox"/> No |
| <b>Renal Replacement</b> | <input type="checkbox"/> Yes<br><input type="checkbox"/> No | <input type="checkbox"/> Yes<br><input type="checkbox"/> No | <input type="checkbox"/> Yes<br><input type="checkbox"/> No | <input type="checkbox"/> Yes<br><input type="checkbox"/> No | <input type="checkbox"/> Yes<br><input type="checkbox"/> No | <input type="checkbox"/> Yes<br><input type="checkbox"/> No | <input type="checkbox"/> Yes<br><input type="checkbox"/> No | <input type="checkbox"/> Yes<br><input type="checkbox"/> No | <input type="checkbox"/> Yes<br><input type="checkbox"/> No | <input type="checkbox"/> Yes<br><input type="checkbox"/> No |
| <b>Myocarditis</b>       | <input type="checkbox"/> Yes<br><input type="checkbox"/> No | <input type="checkbox"/> Yes<br><input type="checkbox"/> No | <input type="checkbox"/> Yes<br><input type="checkbox"/> No | <input type="checkbox"/> Yes<br><input type="checkbox"/> No | <input type="checkbox"/> Yes<br><input type="checkbox"/> No | <input type="checkbox"/> Yes<br><input type="checkbox"/> No | <input type="checkbox"/> Yes<br><input type="checkbox"/> No | <input type="checkbox"/> Yes<br><input type="checkbox"/> No | <input type="checkbox"/> Yes<br><input type="checkbox"/> No | <input type="checkbox"/> Yes<br><input type="checkbox"/> No |

## REDCap Section: Day 30

### Day 30 – Phone Call/Chart Review

1. Date of Day 30 assessment (DD/MM/YYYY): \_\_/\_\_/\_\_\_\_\_
  2. Were there any adverse events at Day 30 follow-up? If so, entered in AE log?  Yes  No
  3. Were there any NEW COVID-19 medications at Day 30 follow-up? If so, entered in the medication log?  
 Yes  No
  4. Was medical imaging done since randomization up to Day 30 follow-up? If so, filled out medical imaging form?  
 Yes  No
  5. Was there any other blood products (blood components or protein plasma products) transfused since randomization to Day 30 follow-up? If so, filled out transfusion log?  Yes  No
  6. Were there any major protocol deviations? If so, filled out in Major Deviation Form in REDCap?  Yes  No
  7. Status of patient:  Died  Discharged  Still hospitalized  Withdrew consent  Lost to follow-up
    - a. If patient died, date of death (DD/MM/YYYY): \_\_/\_\_/\_\_\_\_\_
    - b. If patient was discharged:
      - i. Date of discharge (DD/MM/YYYY): \_\_/\_\_/\_\_\_\_\_
      - ii. Discharged to:
        - Home  Transfer to another facility  Palliative discharge  Other \_\_\_\_\_
      - iii. Re-admitted for COVID-19?  Yes  No
        - Date of re-admission (DD/MM/YYYY): \_\_/\_\_/\_\_\_\_\_
        - Was intensive care unit (ICU) level required?  Yes  No
        - If yes, provide the length of stay (days): \_\_\_\_\_
        - Date of discharge from re-admission (DD/MM/YYYY): \_\_/\_\_/\_\_\_\_\_  N/A Still Admitted
      - iv. Re-admitted for non COVID-19?  Yes  No
        - If yes, reason: \_\_\_\_\_
    - c. If lost to follow-up, provide reason, date of last contact, other details: \_\_\_\_\_
- 
8. Was the patient ever admitted to the ICU?  Yes  No
    - a. If yes, admission date (DD/MM/YYYY): \_\_/\_\_/\_\_\_\_\_
    - b. Length of stay (days): \_\_\_\_\_
    - c. Patient still in ICU at day 30?  Yes  No
  9. Was the patient ever intubated?  Yes  No
    - a. Intubation date(s) and time(s) (DD/MM/YYYY HH:MM):
      - i. \_\_/\_\_/\_\_\_\_\_ \_\_:\_\_
      - ii. \_\_/\_\_/\_\_\_\_\_ \_\_:\_\_
      - iii. \_\_/\_\_/\_\_\_\_\_ \_\_:\_\_
  10. Was the patient ever extubated?  Yes  No
    - a. Extubation date(s) and time (s) (DD/MM/YYYY HH:MM):
      - i. \_\_/\_\_/\_\_\_\_\_ \_\_:\_\_
      - ii. \_\_/\_\_/\_\_\_\_\_ \_\_:\_\_
      - iii. \_\_/\_\_/\_\_\_\_\_ \_\_:\_\_
  10. Was the patient co-enrolled in any other trial at any point during the study (including already enrolled at baseline)?  Yes  No
    - a. Name of trial(s): \_\_\_\_\_
    - b. Arm of trial(s): \_\_\_\_\_

\*If any medications were administered as part of the trial, please complete the medication form in the 'as needed' section

EQ-5D-5L (QoL Questionnaire) – at 30 days **USE THIS AS THE SOURCE DOCUMENT**

We are trying to find out what you think about your health. I will first ask you some simple questions about your health TODAY. I will then ask you to rate your health on a measuring scale. I will explain what to do as I go along but please interrupt me if you do not understand something or if things are not clear to you. Please also remember that there are no right or wrong answers. We are interested here only in your personal view.

**First I am going to read out some questions. Each question has a choice of five answers. Please tell me which answer best describes your health TODAY. Do not choose more than one answer in each group of questions.**

- The participant is not capable of responding

Date of survey (dd/mm/yyyy): \_\_/\_\_/\_\_\_\_

Please tick ONE box that describes your health TODAY:

1. Mobility

- You have no problems in walking about
- You have slight problems in walking about
- You have moderate problems in walking about
- You have severe problems in walking about
- You am unable to walk about

Please tick ONE box that describes your health TODAY:

2. Self-Care

- You have no problems washing or dressing myself
- You have slight problems washing or dressing myself
- You have moderate problems washing or dressing myself
- You have severe problems washing or dressing myself
- You am unable to wash or dress myself

Please tick ONE box that describes your health TODAY:

3. Usual Activities (e.g., work, study, housework, family or leisure activities)

- You have no problems doing my usual activities
- You have slight problems doing my usual activities
- You have moderate problems doing my usual activities
- You have severe problems doing my usual activities
- You am unable to od my usual activities

Please tick ONE box that describes your health TODAY:

4. Pain/Discomfort:

- You have no pain or discomfort
- You have slight pain or discomfort
- You have moderate pain or discomfort
- You have severe pain or discomfort
- You have extreme pain or discomfort

Please tick ONE box that describes your health TODAY:

5. Anxiety/Depression:

- You am not anxious or depressed
- You am slightly anxious or depressed
- You am moderately anxious or depressed
- You am severely anxious or depressed
- You am extremely anxious or depressed

## REDCap Section: Day 90

### 90 Day Status (for patients still in hospital at Day 30) – no call required, just vital status between Day 30–90 follow-up

1. Was the patient still hospitalized at Day 30 (If 'No', skip to 'Investigator Review')?  Yes  No
2. Date of Day 90 follow up (DD/MM/YYYY): \_\_/\_\_/\_\_\_\_
3. What is the status at Day 90 for this participant:  Died  Discharged  Hospitalized  
If participant died, date participant died (DD/MM/YYYY): \_\_/\_\_/\_\_\_\_  
If participant was discharged, date of discharge (DD/MM/YYYY): \_\_/\_\_/\_\_\_\_

### Investigator Review

1. Date of review (DD/MM/YYYY): \_\_/\_\_/\_\_\_\_
2. I have reviewed the records for this participant and confirm they are correct and complete:  Yes  No

**Please have your investigator e-sign and lock the record in REDCap**



## REDCap Section: As Needed

### COVID-19 Relevant Treatment Medication Log (use as many as needed)

|                                                                                                                                                                                                                                                                |                                                                                                                                                                                                                                                                                                                               |
|----------------------------------------------------------------------------------------------------------------------------------------------------------------------------------------------------------------------------------------------------------------|-------------------------------------------------------------------------------------------------------------------------------------------------------------------------------------------------------------------------------------------------------------------------------------------------------------------------------|
| <b>Medication Name:</b><br>_____                                                                                                                                                                                                                               | Medication start date (DD/MM/YYYY): __/__/_____<br>Medication stop date (DD/MM/YYYY): __/__/_____                                                                                                                                                                                                                             |
| <b>MEDICATION TYPE</b>                                                                                                                                                                                                                                         |                                                                                                                                                                                                                                                                                                                               |
| <b>1. Antibiotics</b><br><input type="checkbox"/> Azithromycin<br><input type="checkbox"/> Other antibiotic, specify: _____                                                                                                                                    | <b>2. Anti-inflammatory/immunomodulatory</b><br><input type="checkbox"/> Tocilizumab <input type="checkbox"/> Systemic corticosteroids<br><input type="checkbox"/> Colchicine <input type="checkbox"/> Inhaled corticosteroids<br><input type="checkbox"/> Interferon <input type="checkbox"/> Other anti-inflammatory: _____ |
| <b>3. Anti-viral</b><br><input type="checkbox"/> Chloroquine/hydroxychloroquine<br><input type="checkbox"/> Lopinavir-ritonavir<br><input type="checkbox"/> Oseltamivir <input type="checkbox"/> Remdesivir<br><input type="checkbox"/> Other antiviral: _____ | <b>4. Anti-coagulants</b><br><input type="checkbox"/> Direct oral anticoagulant<br><input type="checkbox"/> Unfractionated Heparin<br><input type="checkbox"/> Low Molecular Weight Heparin<br><input type="checkbox"/> Warfarin<br><input type="checkbox"/> Other: _____                                                     |
| <b>5. Other COVID relevant medications:</b> _____                                                                                                                                                                                                              | <b>4b. If DOAC, UFH, LMWH or other:</b><br>Dose: <input type="checkbox"/> Prophylactic <input type="checkbox"/> Therapeutic                                                                                                                                                                                                   |
| Was this medication administered as part of a study? <input type="checkbox"/> Yes <input type="checkbox"/> No<br>i. Name of study: _____<br>ii. Arm of study: <input type="checkbox"/> Drug listed above or <input type="checkbox"/> UNKNOWN—blinded study     |                                                                                                                                                                                                                                                                                                                               |

|                                                                                                                                                                                                                                                                |                                                                                                                                                                                                                                                                                                                               |
|----------------------------------------------------------------------------------------------------------------------------------------------------------------------------------------------------------------------------------------------------------------|-------------------------------------------------------------------------------------------------------------------------------------------------------------------------------------------------------------------------------------------------------------------------------------------------------------------------------|
| <b>Medication Name:</b><br>_____                                                                                                                                                                                                                               | Medication start date (DD/MM/YYYY): __/__/_____<br>Medication stop date (DD/MM/YYYY): __/__/_____                                                                                                                                                                                                                             |
| <b>MEDICATION TYPE</b>                                                                                                                                                                                                                                         |                                                                                                                                                                                                                                                                                                                               |
| <b>1. Antibiotics</b><br><input type="checkbox"/> Azithromycin<br><input type="checkbox"/> Other antibiotic, specify: _____                                                                                                                                    | <b>2. Anti-inflammatory/immunomodulatory</b><br><input type="checkbox"/> Tocilizumab <input type="checkbox"/> Systemic corticosteroids<br><input type="checkbox"/> Colchicine <input type="checkbox"/> Inhaled corticosteroids<br><input type="checkbox"/> Interferon <input type="checkbox"/> Other anti-inflammatory: _____ |
| <b>3. Anti-viral</b><br><input type="checkbox"/> Chloroquine/hydroxychloroquine<br><input type="checkbox"/> Lopinavir-ritonavir<br><input type="checkbox"/> Oseltamivir <input type="checkbox"/> Remdesivir<br><input type="checkbox"/> Other antiviral: _____ | <b>4. Anti-coagulants</b><br><input type="checkbox"/> Direct oral anticoagulant<br><input type="checkbox"/> Unfractionated Heparin<br><input type="checkbox"/> Low Molecular Weight Heparin<br><input type="checkbox"/> Warfarin<br><input type="checkbox"/> Other: _____                                                     |
| <b>5. Other COVID relevant medications:</b> _____                                                                                                                                                                                                              | <b>4b. If DOAC, UFH, LMWH or other:</b><br>Dose: <input type="checkbox"/> Prophylactic <input type="checkbox"/> Therapeutic                                                                                                                                                                                                   |
| Was this medication administered as part of a study? <input type="checkbox"/> Yes <input type="checkbox"/> No<br>i. Name of study: _____<br>ii. Arm of study: <input type="checkbox"/> Drug listed above or <input type="checkbox"/> UNKNOWN—blinded study     |                                                                                                                                                                                                                                                                                                                               |

**Pregnancy Outcomes**

1. Date of follow up call (DD/MM/YYYY): \_\_/\_\_/\_\_\_\_\_
2. Birth status:  Live     Stillborn     Miscarriage     Other: \_\_\_\_\_
3. Date of birth or termination/end of pregnancy (DD/MM/YYYY): \_\_/\_\_/\_\_\_\_\_
4. Where there any serious maternal issues during pregnancy or delivery?  Yes     No
  - a. If yes, describe the maternal issues:

5. Where there any fetal/newborn issues?  Yes     No
  - a. If yes, describe the fetal/newborn issues:

\*follow AE/SAE reporting guidelines in protocol in the event of any issues identified during follow-up call

**Re-consent form**

1. Date of re-consent: (DD/MM/YYYY): \_\_/\_\_/\_\_\_\_\_
2. Reason for re-consent:
  - Written consent required (verbal consent initially obtained)
  - Consent of patient required (legal representative initially obtained)
  - Participant has reached the age of 18
  - New version date of consent
  - Other: \_\_\_\_\_
3. Method of consent:  Verbal     Written
4. Protocol Version: \_\_\_\_\_
5. Consent Version: \_\_\_\_\_
6. Person obtaining consent: \_\_\_\_\_

**Non-CCP Transfusion Requirements – complete up to Day 30/discharge**

| #  | Product | # Units/<br>Volume | Apheresis/<br>Non-Apheresis* | Date of collection<br>(plasma only)<br>(dd.mmm.yyyy) | Date of transfusion<br>(dd.mmm.yyyy) |
|----|---------|--------------------|------------------------------|------------------------------------------------------|--------------------------------------|
| 1  |         |                    |                              |                                                      |                                      |
| 2  |         |                    |                              |                                                      |                                      |
| 3  |         |                    |                              |                                                      |                                      |
| 4  |         |                    |                              |                                                      |                                      |
| 5  |         |                    |                              |                                                      |                                      |
| 6  |         |                    |                              |                                                      |                                      |
| 7  |         |                    |                              |                                                      |                                      |
| 8  |         |                    |                              |                                                      |                                      |
| 9  |         |                    |                              |                                                      |                                      |
| 10 |         |                    |                              |                                                      |                                      |
| 11 |         |                    |                              |                                                      |                                      |
| 12 |         |                    |                              |                                                      |                                      |
| 13 |         |                    |                              |                                                      |                                      |
| 14 |         |                    |                              |                                                      |                                      |
| 15 |         |                    |                              |                                                      |                                      |
| 16 |         |                    |                              |                                                      |                                      |
| 17 |         |                    |                              |                                                      |                                      |
| 18 |         |                    |                              |                                                      |                                      |
| 19 |         |                    |                              |                                                      |                                      |
| 20 |         |                    |                              |                                                      |                                      |
| 21 |         |                    |                              |                                                      |                                      |
| 22 |         |                    |                              |                                                      |                                      |
| 23 |         |                    |                              |                                                      |                                      |
| 24 |         |                    |                              |                                                      |                                      |
| 25 |         |                    |                              |                                                      |                                      |
| 26 |         |                    |                              |                                                      |                                      |
| 27 |         |                    |                              |                                                      |                                      |
| 28 |         |                    |                              |                                                      |                                      |
| 29 |         |                    |                              |                                                      |                                      |
| 30 |         |                    |                              |                                                      |                                      |

\*applies to PLT or FP only

### Medical Imaging Post-Randomization (use as many as needed)

Note: only imaging done for COVID-19 reasons needs to be captured (eg. imaging pre-/post- PICC line insertion does not need to be entered).

|                                                                                            |                                                                                                                                                                                                                                                                      |
|--------------------------------------------------------------------------------------------|----------------------------------------------------------------------------------------------------------------------------------------------------------------------------------------------------------------------------------------------------------------------|
| <b>Medical Image 1:</b>                                                                    | Date (DD/MM/YYYY): __/__/_____                                                                                                                                                                                                                                       |
| <b>1. Type</b><br><input type="checkbox"/> CT Chest<br><input type="checkbox"/> Chest Xray | <b>2. Result</b><br><input type="checkbox"/> Normal <span style="float: right;"><input type="checkbox"/> No result documented</span><br><input type="checkbox"/> Patchy Shadowing<br><input type="checkbox"/> Infiltrates<br><input type="checkbox"/> Other Abnormal |
| <b>Medical Image 2:</b>                                                                    | Date (DD/MM/YYYY): __/__/_____                                                                                                                                                                                                                                       |
| <b>1. Type</b><br><input type="checkbox"/> CT Chest<br><input type="checkbox"/> Chest Xray | <b>2. Result</b><br><input type="checkbox"/> Normal <span style="float: right;"><input type="checkbox"/> No result documented</span><br><input type="checkbox"/> Patchy Shadowing<br><input type="checkbox"/> Infiltrates<br><input type="checkbox"/> Other Abnormal |
| <b>Medical Image 3:</b>                                                                    | Date (DD/MM/YYYY): __/__/_____                                                                                                                                                                                                                                       |
| <b>1. Type</b><br><input type="checkbox"/> CT Chest<br><input type="checkbox"/> Chest Xray | <b>2. Result</b><br><input type="checkbox"/> Normal <span style="float: right;"><input type="checkbox"/> No result documented</span><br><input type="checkbox"/> Patchy Shadowing<br><input type="checkbox"/> Infiltrates<br><input type="checkbox"/> Other Abnormal |
| <b>Medical Image 4:</b>                                                                    | Date (DD/MM/YYYY): __/__/_____                                                                                                                                                                                                                                       |
| <b>1. Type</b><br><input type="checkbox"/> CT Chest<br><input type="checkbox"/> Chest Xray | <b>2. Result</b><br><input type="checkbox"/> Normal <span style="float: right;"><input type="checkbox"/> No result documented</span><br><input type="checkbox"/> Patchy Shadowing<br><input type="checkbox"/> Infiltrates<br><input type="checkbox"/> Other Abnormal |
| <b>Medical Image 5:</b>                                                                    | Date (DD/MM/YYYY): __/__/_____                                                                                                                                                                                                                                       |
| <b>1. Type</b><br><input type="checkbox"/> CT Chest<br><input type="checkbox"/> Chest Xray | <b>2. Result</b><br><input type="checkbox"/> Normal <span style="float: right;"><input type="checkbox"/> No result documented</span><br><input type="checkbox"/> Patchy Shadowing<br><input type="checkbox"/> Infiltrates<br><input type="checkbox"/> Other Abnormal |
| <b>Medical Image 6:</b>                                                                    | Date (DD/MM/YYYY): __/__/_____                                                                                                                                                                                                                                       |
| <b>1. Type</b><br><input type="checkbox"/> CT Chest<br><input type="checkbox"/> Chest Xray | <b>2. Result</b><br><input type="checkbox"/> Normal <span style="float: right;"><input type="checkbox"/> No result documented</span><br><input type="checkbox"/> Patchy Shadowing<br><input type="checkbox"/> Infiltrates<br><input type="checkbox"/> Other Abnormal |
| <b>Medical Image 7:</b>                                                                    | Date (DD/MM/YYYY): __/__/_____                                                                                                                                                                                                                                       |
| <b>1. Type</b><br><input type="checkbox"/> CT Chest<br><input type="checkbox"/> Chest Xray | <b>2. Result</b><br><input type="checkbox"/> Normal <span style="float: right;"><input type="checkbox"/> No result documented</span><br><input type="checkbox"/> Patchy Shadowing<br><input type="checkbox"/> Infiltrates<br><input type="checkbox"/> Other Abnormal |
| <b>Medical Image 8:</b>                                                                    | Date (DD/MM/YYYY): __/__/_____                                                                                                                                                                                                                                       |
| <b>1. Type</b><br><input type="checkbox"/> CT Chest<br><input type="checkbox"/> Chest Xray | <b>2. Result</b><br><input type="checkbox"/> Normal <span style="float: right;"><input type="checkbox"/> No result documented</span><br><input type="checkbox"/> Patchy Shadowing<br><input type="checkbox"/> Infiltrates<br><input type="checkbox"/> Other Abnormal |

**Blood Sample Collection for Viral Load/Antibody testing****Additional Sample**

1. Was an additional sample collected?     Yes     No
2. Date and time blood sample collected from patient (DD/MM/YYYY HH:MM): \_\_/\_\_/\_\_\_\_: \_\_
3. Date and time research sample processed (DD/MM/YYYY HH:MM): \_\_/\_\_/\_\_\_\_: \_\_
4. Sample ID number (please make sure you have entered this into REDCap within one week): \_\_\_\_\_
5. a. Type of sample:  Serum     Plasma  
b. Type of anticoagulant:  EDTA  Citrate  Lithium  Heparin  NaF
6. Number of cryovials collected:  1     2
7. Volume per tube:
  - a. Tube 1: \_\_\_\_\_
  - b. Tube 2: \_\_\_\_\_

\*Use this form if you collect any additional samples (eg. sample at 48 hours was from a tube with lithium or heparin as the anticoagulant and a sample in a preferred anticoagulant became available later)

**Additional Sample**

1. Was an additional sample collected?     Yes     No
2. Date and time blood sample collected from patient (DD/MM/YYYY HH:MM): \_\_/\_\_/\_\_\_\_: \_\_
3. Date and time research sample processed (DD/MM/YYYY HH:MM): \_\_/\_\_/\_\_\_\_: \_\_
4. Sample ID number (please make sure you have entered this into REDCap within one week): \_\_\_\_\_
5. a. Type of sample:  Serum     Plasma  
b. Type of anticoagulant:  EDTA  Citrate  Lithium  Heparin  NaF
6. Number of cryovials collected:  1     2
7. Volume per tube:
  - a. Tube 1: \_\_\_\_\_
  - b. Tube 2: \_\_\_\_\_

Adverse Event Source Forms – please refer to protocol for AE/SAE recording and data entry requirements, and reporting timelines

**NON-CCP-RELATED AE LOG FOR PATIENT RANDOMIZED TO CCP**

| Adverse Event Term | Relationship to CCP transfusion                                                                                                                                                     | Severity Grade (CTCAE v4.0)                                                                                                                                     | Expected complication of COVID-19, critical care or existing condition?                                                                                                                                                                                            | Expedited SAE reporting to sponsor (<96h)                                                                                                                                                               | Investigator initials/date                                                                                                                              |
|--------------------|-------------------------------------------------------------------------------------------------------------------------------------------------------------------------------------|-----------------------------------------------------------------------------------------------------------------------------------------------------------------|--------------------------------------------------------------------------------------------------------------------------------------------------------------------------------------------------------------------------------------------------------------------|---------------------------------------------------------------------------------------------------------------------------------------------------------------------------------------------------------|---------------------------------------------------------------------------------------------------------------------------------------------------------|
| Start Date         |                                                                                                                                                                                     |                                                                                                                                                                 |                                                                                                                                                                                                                                                                    |                                                                                                                                                                                                         | Resolution at Day 30                                                                                                                                    |
|                    | <input type="checkbox"/> Possible<br><input type="checkbox"/> Unlikely<br><input type="checkbox"/> Not related<br>If definitely or probably related, use transfusion-related AE log | <input type="checkbox"/> 1 } STOP<br><input type="checkbox"/> 2 }<br><br><input type="checkbox"/> 3<br><input type="checkbox"/> 4<br><input type="checkbox"/> 5 | <input type="checkbox"/> UNEXPECTED<br><br>Expected complication of:<br><input type="checkbox"/> COVID-19<br><input type="checkbox"/> Critical care/illness<br><input type="checkbox"/> Pre-existing condition <b>OR</b><br><input type="checkbox"/> Study outcome | <input type="checkbox"/> <b>Yes</b> (serious* + unexpected)<br><br><b>No:</b><br><input type="checkbox"/> Not serious*<br><input type="checkbox"/> Expected<br><input type="checkbox"/> Study outcome   |                                                                                                                                                         |
|                    |                                                                                                                                                                                     |                                                                                                                                                                 |                                                                                                                                                                                                                                                                    |                                                                                                                                                                                                         | <input type="checkbox"/> Resolved <input type="checkbox"/> Ongoing<br><input type="checkbox"/> Resolved with sequelae<br><input type="checkbox"/> Death |
|                    | <input type="checkbox"/> Possible<br><input type="checkbox"/> Unlikely<br><input type="checkbox"/> Not related                                                                      | <input type="checkbox"/> 1 } STOP<br><input type="checkbox"/> 2 }<br><br><input type="checkbox"/> 3<br><input type="checkbox"/> 4<br><input type="checkbox"/> 5 | <input type="checkbox"/> UNEXPECTED<br><br>Expected complication of:<br><input type="checkbox"/> COVID-19<br><input type="checkbox"/> Critical care/illness<br><input type="checkbox"/> Pre-existing condition <b>OR</b><br><input type="checkbox"/> Study outcome | <input type="checkbox"/> <b>Yes</b> (serious* and unexpected)<br><br><b>No:</b><br><input type="checkbox"/> Not serious*<br><input type="checkbox"/> Expected<br><input type="checkbox"/> Study outcome |                                                                                                                                                         |
|                    |                                                                                                                                                                                     |                                                                                                                                                                 |                                                                                                                                                                                                                                                                    |                                                                                                                                                                                                         | <input type="checkbox"/> Resolved <input type="checkbox"/> Ongoing<br><input type="checkbox"/> Resolved with sequelae<br><input type="checkbox"/> Death |
|                    | <input type="checkbox"/> Possible<br><input type="checkbox"/> Unlikely<br><input type="checkbox"/> Not related                                                                      | <input type="checkbox"/> 1 } STOP<br><input type="checkbox"/> 2 }<br><br><input type="checkbox"/> 3<br><input type="checkbox"/> 4<br><input type="checkbox"/> 5 | <input type="checkbox"/> UNEXPECTED<br><br>Expected complication of:<br><input type="checkbox"/> COVID-19<br><input type="checkbox"/> Critical care/illness<br><input type="checkbox"/> Pre-existing condition <b>OR</b><br><input type="checkbox"/> Study outcome | <input type="checkbox"/> <b>Yes</b> (serious* and unexpected)<br><br><b>No:</b><br><input type="checkbox"/> Not serious*<br><input type="checkbox"/> Expected<br><input type="checkbox"/> Study outcome |                                                                                                                                                         |
|                    |                                                                                                                                                                                     |                                                                                                                                                                 |                                                                                                                                                                                                                                                                    |                                                                                                                                                                                                         | <input type="checkbox"/> Resolved <input type="checkbox"/> Ongoing<br><input type="checkbox"/> Resolved with sequelae<br><input type="checkbox"/> Death |
|                    | <input type="checkbox"/> Possible<br><input type="checkbox"/> Unlikely<br><input type="checkbox"/> Not related                                                                      | <input type="checkbox"/> 1 } STOP<br><input type="checkbox"/> 2 }<br><br><input type="checkbox"/> 3<br><input type="checkbox"/> 4<br><input type="checkbox"/> 5 | <input type="checkbox"/> UNEXPECTED<br><br>Expected complication of:<br><input type="checkbox"/> COVID-19<br><input type="checkbox"/> Critical care/illness<br><input type="checkbox"/> Pre-existing condition <b>OR</b><br><input type="checkbox"/> Study outcome | <input type="checkbox"/> <b>Yes</b> (serious* and unexpected)<br><br><b>No:</b><br><input type="checkbox"/> Not serious*<br><input type="checkbox"/> Expected<br><input type="checkbox"/> Study outcome |                                                                                                                                                         |
|                    |                                                                                                                                                                                     |                                                                                                                                                                 |                                                                                                                                                                                                                                                                    |                                                                                                                                                                                                         | <input type="checkbox"/> Resolved <input type="checkbox"/> Ongoing<br><input type="checkbox"/> Resolved with sequelae<br><input type="checkbox"/> Death |

\*Serious = Results in death, is life-threatening, prolongs hospitalization or needs invasive procedure, leads to disability, congenital anomaly or birth defect, or is not immediately life-threatening but may jeopardize the subject or require intervention to prevent any of these events

### CCP-RELATED AE LOG

| Adverse Event Term | Relationship to CCP transfusion                                                                                                 | Severity                                                                                                                                           |                                                                                                                      | Expected complication of plasma transfusion?                                 | Expedited SAE reporting to sponsor (<24h)                                                                                                                                                                                     | Investigator initials/date                                                                                                                              |
|--------------------|---------------------------------------------------------------------------------------------------------------------------------|----------------------------------------------------------------------------------------------------------------------------------------------------|----------------------------------------------------------------------------------------------------------------------|------------------------------------------------------------------------------|-------------------------------------------------------------------------------------------------------------------------------------------------------------------------------------------------------------------------------|---------------------------------------------------------------------------------------------------------------------------------------------------------|
|                    |                                                                                                                                 | CTCAE                                                                                                                                              | ISBT                                                                                                                 |                                                                              |                                                                                                                                                                                                                               | Resolution at Day 30                                                                                                                                    |
| Start Date         |                                                                                                                                 |                                                                                                                                                    |                                                                                                                      |                                                                              |                                                                                                                                                                                                                               |                                                                                                                                                         |
|                    | <input type="checkbox"/> Definite<br><input type="checkbox"/> Probable<br><br>If less than probably related, use regular AE log | <input type="checkbox"/> 1<br><input type="checkbox"/> 2<br><input type="checkbox"/> 3<br><input type="checkbox"/> 4<br><input type="checkbox"/> 5 | <input type="checkbox"/> 1<br><input type="checkbox"/> 2<br><input type="checkbox"/> 3<br><input type="checkbox"/> 4 | <input type="checkbox"/> UNEXPECTED<br><br><input type="checkbox"/> Expected | <b>Yes :</b> <input type="checkbox"/> TRALI<br><input type="checkbox"/> TACO<br><input type="checkbox"/> serious* and unexpected<br><br><b>No:</b> <input type="checkbox"/> Expected<br><input type="checkbox"/> Not serious* | <input type="checkbox"/> Resolved <input type="checkbox"/> Ongoing<br><input type="checkbox"/> Resolved with sequelae<br><input type="checkbox"/> Death |
|                    |                                                                                                                                 |                                                                                                                                                    |                                                                                                                      |                                                                              |                                                                                                                                                                                                                               |                                                                                                                                                         |
|                    | <input type="checkbox"/> Definite<br><input type="checkbox"/> Probable                                                          | <input type="checkbox"/> 1<br><input type="checkbox"/> 2<br><input type="checkbox"/> 3<br><input type="checkbox"/> 4<br><input type="checkbox"/> 5 | <input type="checkbox"/> 1<br><input type="checkbox"/> 2<br><input type="checkbox"/> 3<br><input type="checkbox"/> 4 | <input type="checkbox"/> UNEXPECTED<br><br><input type="checkbox"/> Expected | <b>Yes :</b> <input type="checkbox"/> TRALI<br><input type="checkbox"/> TACO<br><input type="checkbox"/> serious* and unexpected<br><br><b>No:</b> <input type="checkbox"/> Expected<br><input type="checkbox"/> Not serious* | <input type="checkbox"/> Resolved <input type="checkbox"/> Ongoing<br><input type="checkbox"/> Resolved with sequelae<br><input type="checkbox"/> Death |
|                    |                                                                                                                                 |                                                                                                                                                    |                                                                                                                      |                                                                              |                                                                                                                                                                                                                               |                                                                                                                                                         |
|                    | <input type="checkbox"/> Definite<br><input type="checkbox"/> Probable                                                          | <input type="checkbox"/> 1<br><input type="checkbox"/> 2<br><input type="checkbox"/> 3<br><input type="checkbox"/> 4<br><input type="checkbox"/> 5 | <input type="checkbox"/> 1<br><input type="checkbox"/> 2<br><input type="checkbox"/> 3<br><input type="checkbox"/> 4 | <input type="checkbox"/> UNEXPECTED<br><br><input type="checkbox"/> Expected | <b>Yes :</b> <input type="checkbox"/> TRALI<br><input type="checkbox"/> TACO<br><input type="checkbox"/> serious* and unexpected<br><br><b>No:</b> <input type="checkbox"/> Expected<br><input type="checkbox"/> Not serious* | <input type="checkbox"/> Resolved <input type="checkbox"/> Ongoing<br><input type="checkbox"/> Resolved with sequelae<br><input type="checkbox"/> Death |
|                    |                                                                                                                                 |                                                                                                                                                    |                                                                                                                      |                                                                              |                                                                                                                                                                                                                               |                                                                                                                                                         |
|                    | <input type="checkbox"/> Definite<br><input type="checkbox"/> Probable                                                          | <input type="checkbox"/> 1<br><input type="checkbox"/> 2<br><input type="checkbox"/> 3<br><input type="checkbox"/> 4<br><input type="checkbox"/> 5 | <input type="checkbox"/> 1<br><input type="checkbox"/> 2<br><input type="checkbox"/> 3<br><input type="checkbox"/> 4 | <input type="checkbox"/> UNEXPECTED<br><br><input type="checkbox"/> Expected | <b>Yes :</b> <input type="checkbox"/> TRALI<br><input type="checkbox"/> TACO<br><input type="checkbox"/> serious* and unexpected<br><br><b>No:</b> <input type="checkbox"/> Expected<br><input type="checkbox"/> Not serious* | <input type="checkbox"/> Resolved <input type="checkbox"/> Ongoing<br><input type="checkbox"/> Resolved with sequelae<br><input type="checkbox"/> Death |
|                    |                                                                                                                                 |                                                                                                                                                    |                                                                                                                      |                                                                              |                                                                                                                                                                                                                               |                                                                                                                                                         |

\*Serious = Results in death, is life-threatening, prolongs hospitalization or needs invasive procedure, leads to disability, congenital anomaly or birth defect, or is not immediately life-threatening but may jeopardize the subject or require intervention to prevent any of these events

### STANDARD OF CARE AE LOG

| Adverse Event Term | Severity Grade (CTCAE v4.0)                                                                                                                                     | Expected complication of COVID-19, critical care or existing condition?                                                                                                                                                                                            | Expedited SAE reporting to sponsor (<96h)                                                                                                                                                               | Investigator initials/date                                                                                                                              |
|--------------------|-----------------------------------------------------------------------------------------------------------------------------------------------------------------|--------------------------------------------------------------------------------------------------------------------------------------------------------------------------------------------------------------------------------------------------------------------|---------------------------------------------------------------------------------------------------------------------------------------------------------------------------------------------------------|---------------------------------------------------------------------------------------------------------------------------------------------------------|
| Start Date         |                                                                                                                                                                 |                                                                                                                                                                                                                                                                    |                                                                                                                                                                                                         | Resolution at Day 30                                                                                                                                    |
|                    | <input type="checkbox"/> 1 }<br><input type="checkbox"/> 2 } STOP<br><br><input type="checkbox"/> 3<br><input type="checkbox"/> 4<br><input type="checkbox"/> 5 | <input type="checkbox"/> UNEXPECTED<br><br>Expected complication of:<br><input type="checkbox"/> COVID-19<br><input type="checkbox"/> Critical care/illness<br><input type="checkbox"/> Pre-existing condition <b>OR</b><br><input type="checkbox"/> Study outcome | <input type="checkbox"/> <b>Yes</b> (serious* and unexpected)<br><br><b>No:</b><br><input type="checkbox"/> Not serious*<br><input type="checkbox"/> Expected<br><input type="checkbox"/> Study outcome |                                                                                                                                                         |
|                    |                                                                                                                                                                 |                                                                                                                                                                                                                                                                    |                                                                                                                                                                                                         | <input type="checkbox"/> Resolved <input type="checkbox"/> Ongoing<br><input type="checkbox"/> Resolved with sequelae<br><input type="checkbox"/> Death |
|                    | <input type="checkbox"/> 1 }<br><input type="checkbox"/> 2 } STOP<br><br><input type="checkbox"/> 3<br><input type="checkbox"/> 4<br><input type="checkbox"/> 5 | <input type="checkbox"/> UNEXPECTED<br><br>Expected complication of:<br><input type="checkbox"/> COVID-19<br><input type="checkbox"/> Critical care/illness<br><input type="checkbox"/> Pre-existing condition <b>OR</b><br><input type="checkbox"/> Study outcome | <input type="checkbox"/> <b>Yes</b> (serious* and unexpected)<br><br><b>No:</b><br><input type="checkbox"/> Not serious*<br><input type="checkbox"/> Expected<br><input type="checkbox"/> Study outcome |                                                                                                                                                         |
|                    |                                                                                                                                                                 |                                                                                                                                                                                                                                                                    |                                                                                                                                                                                                         | <input type="checkbox"/> Resolved <input type="checkbox"/> Ongoing<br><input type="checkbox"/> Resolved with sequelae<br><input type="checkbox"/> Death |
|                    | <input type="checkbox"/> 1 }<br><input type="checkbox"/> 2 } STOP<br><br><input type="checkbox"/> 3<br><input type="checkbox"/> 4<br><input type="checkbox"/> 5 | <input type="checkbox"/> UNEXPECTED<br><br>Expected complication of:<br><input type="checkbox"/> COVID-19<br><input type="checkbox"/> Critical care/illness<br><input type="checkbox"/> Pre-existing condition <b>OR</b><br><input type="checkbox"/> Study outcome | <input type="checkbox"/> <b>Yes</b> (serious* and unexpected)<br><br><b>No:</b><br><input type="checkbox"/> Not serious*<br><input type="checkbox"/> Expected<br><input type="checkbox"/> Study outcome |                                                                                                                                                         |
|                    |                                                                                                                                                                 |                                                                                                                                                                                                                                                                    |                                                                                                                                                                                                         | <input type="checkbox"/> Resolved <input type="checkbox"/> Ongoing<br><input type="checkbox"/> Resolved with sequelae<br><input type="checkbox"/> Death |
|                    | <input type="checkbox"/> 1 }<br><input type="checkbox"/> 2 } STOP<br><br><input type="checkbox"/> 3<br><input type="checkbox"/> 4<br><input type="checkbox"/> 5 | <input type="checkbox"/> UNEXPECTED<br><br>Expected complication of:<br><input type="checkbox"/> COVID-19<br><input type="checkbox"/> Critical care/illness<br><input type="checkbox"/> Pre-existing condition <b>OR</b><br><input type="checkbox"/> Study outcome | <input type="checkbox"/> <b>Yes</b> (serious* and unexpected)<br><br><b>No:</b><br><input type="checkbox"/> Not serious*<br><input type="checkbox"/> Expected<br><input type="checkbox"/> Study outcome |                                                                                                                                                         |
|                    |                                                                                                                                                                 |                                                                                                                                                                                                                                                                    |                                                                                                                                                                                                         | <input type="checkbox"/> Resolved <input type="checkbox"/> Ongoing<br><input type="checkbox"/> Resolved with sequelae<br><input type="checkbox"/> Death |

\*Serious = Results in death, is life-threatening, prolongs hospitalization or needs invasive procedure, leads to disability, congenital anomaly or birth defect, or is not immediately life-threatening but may jeopardize the subject or require intervention to prevent any of these events



**Serious Adverse Event Reporting Form – must also be entered into REDCap**

This form must be completed, entered, and uploaded into the EDC within 24 or 96 hours of becoming aware of any **reportable SAE**. Alternatively, the investigator may e-sign the SAE eCRF in REDCap. (See protocol and operations manual for expedited reporting timelines).

\*Note this form may undergo updates outside of CRF updates; check your regulatory binder or OneDrive for most recent version.

Patient ID#: \_\_\_\_\_

Type of Report:  Initial  Follow-up #: \_\_\_\_\_ SAE identifier: \_\_\_\_\_

|                                                                                                                                                                     |                                                                                                                                                                                                                                                                                                                                                                                                                                                          |
|---------------------------------------------------------------------------------------------------------------------------------------------------------------------|----------------------------------------------------------------------------------------------------------------------------------------------------------------------------------------------------------------------------------------------------------------------------------------------------------------------------------------------------------------------------------------------------------------------------------------------------------|
| Medical Term for Event                                                                                                                                              |                                                                                                                                                                                                                                                                                                                                                                                                                                                          |
| <b>Reason Why Event Serious</b>                                                                                                                                     | <input type="checkbox"/> Fatal<br><input type="checkbox"/> Life-threatening<br><input type="checkbox"/> Requires hospitalization (overnight or longer) or prolongation of existing hospitalization<br>invasive procedure<br><input type="checkbox"/> Results in persistent or significant disability or incapacity<br><input type="checkbox"/> Results in congenital anomaly or birth defect<br><input type="checkbox"/> Other medically important event |
| Description of the event.<br><i>In case pt died, has this event contributed to the patient's death:</i><br><input type="checkbox"/> Yes <input type="checkbox"/> No |                                                                                                                                                                                                                                                                                                                                                                                                                                                          |
| Event Onset<br>(dd.mmm.yyyy)- (hh:mm)                                                                                                                               |                                                                                                                                                                                                                                                                                                                                                                                                                                                          |
| Outcome                                                                                                                                                             | <input type="checkbox"/> Recovered, resolved<br><input type="checkbox"/> Not recovered/resolved (by Day 30) <input type="checkbox"/> Recovered/resolved w/sequelae<br><input type="checkbox"/> Fatal <input type="checkbox"/> Unknown                                                                                                                                                                                                                    |
| Event Stop<br>(dd.mmm.yyyy) – (hh:mm)                                                                                                                               |                                                                                                                                                                                                                                                                                                                                                                                                                                                          |
| Severity                                                                                                                                                            | <input type="checkbox"/> Grade 1 <input type="checkbox"/> Grade 2 <input type="checkbox"/> Grade 3 <input type="checkbox"/> Grade 4 <input type="checkbox"/> Grade 5                                                                                                                                                                                                                                                                                     |
| <b>Was patient randomized to CCP?</b> <input type="checkbox"/> Yes <input type="checkbox"/> No                                                                      |                                                                                                                                                                                                                                                                                                                                                                                                                                                          |
| <b>Relation to CCP</b>                                                                                                                                              |                                                                                                                                                                                                                                                                                                                                                                                                                                                          |
| Causality                                                                                                                                                           | <input type="checkbox"/> Unrelated <input type="checkbox"/> Unlikely <input type="checkbox"/> Possible <input type="checkbox"/> Probable <input type="checkbox"/> Definite                                                                                                                                                                                                                                                                               |
| Classification                                                                                                                                                      | <input type="checkbox"/> Expected <input type="checkbox"/> Unexpected <input type="checkbox"/> NA                                                                                                                                                                                                                                                                                                                                                        |
| <b>Action Taken</b>                                                                                                                                                 |                                                                                                                                                                                                                                                                                                                                                                                                                                                          |
| <i>(Check all that apply)</i>                                                                                                                                       | <input type="checkbox"/> None <input type="checkbox"/> Medication <input type="checkbox"/> Test performed<br><input type="checkbox"/> Procedure <input type="checkbox"/> Other Specify: _____                                                                                                                                                                                                                                                            |
| Details: Provide details of medications (name, dose, and duration), tests, procedures or other actions.                                                             |                                                                                                                                                                                                                                                                                                                                                                                                                                                          |

Reporter Name & Role: \_\_\_\_\_

PI/Co-I Signature: \_\_\_\_\_

Date: \_\_\_\_\_

SAE Reporting Form 19 Aug 2020, Version 4.0 – English

### Other Reportable Events

In the event of a TACO/TRALI, overdose, or newly identified pregnancy, complete the Other Reportable Events eCRF (there is no paper form).

The completed form can be printed from the EDC.
